# Supplementary material
Source: PubMed Central journal article supplement (PMC6778243)
Supplement: pnas.1912247116.sapp.pdf [file pnas.1912247116.sapp.pdf]

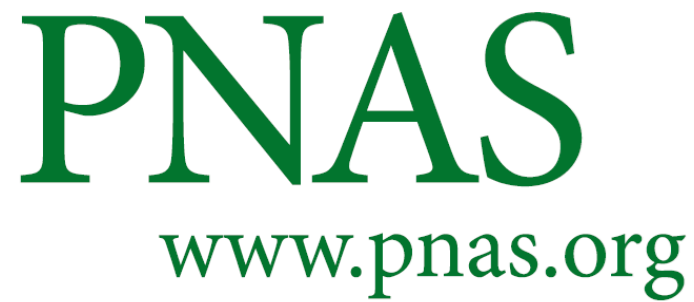

Supplementary Information for

**Climate drives loss of phylogenetic diversity in a grassland community**

Daijiang Li\*, Jesse E. D. Miller, Susan Harrison\*

\*Corresponding author. Email: [spharrison@ucdavis.edu](mailto:spharrison@ucdavis.edu)

**This PDF file includes:**

Figure S1

Tables S1 to S4

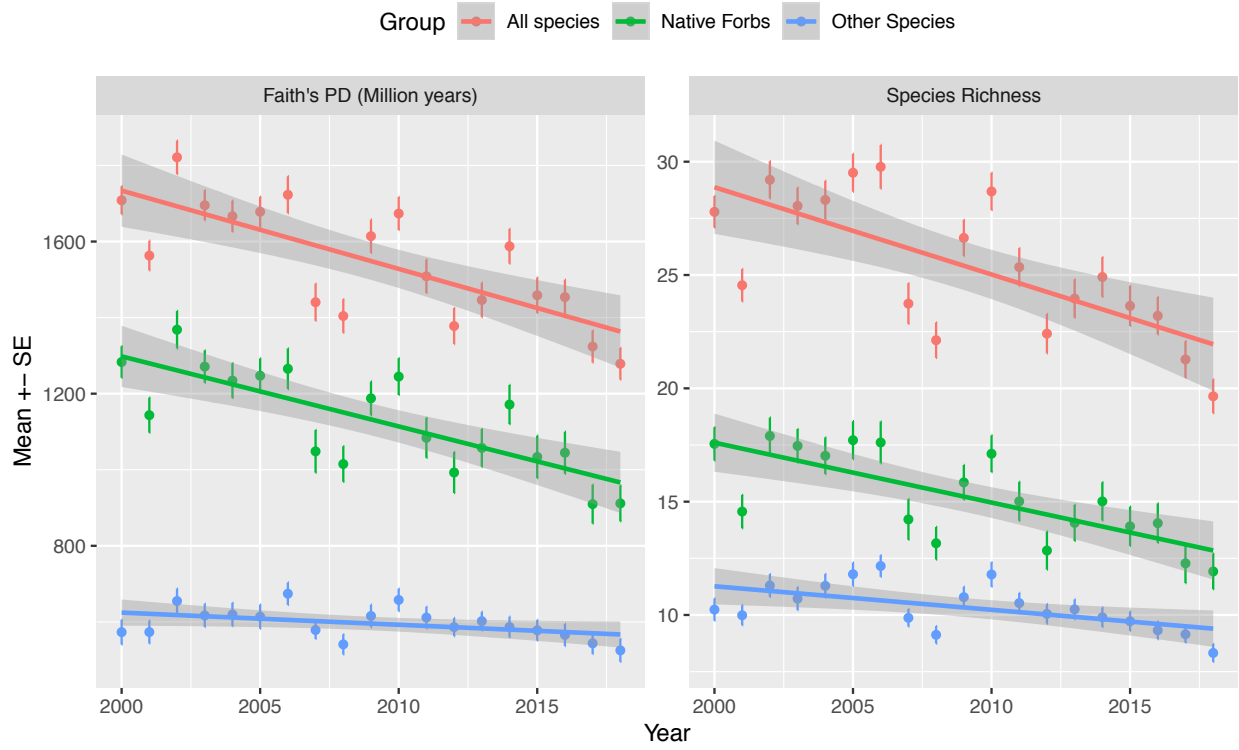

**Fig. S1. Temporal trends in Faith's PD for different groups of species.**

**Table S1. Model results for change in different components of phylogenetic diversity over time.** Values for site level and region level are alpha diversity. Site level alpha diversity was calculated based on species from all five quadrats of each site (one value per site per year). Region level alpha diversity was calculated based on species from all 80 sites (one value per year). Values for within site and within region levels are beta diversity. Within site beta diversity was calculated as average pairwise PCDp between quadrats (one value per site per year). Within region beta diversity was calculated as average pairwise PCDp between sites (one value per year).

| Level                        | Response     | Predictors  | Estimate | SE    | df   | t       | P value | Model |
|------------------------------|--------------|-------------|----------|-------|------|---------|---------|-------|
| Within site (among quadrats) | Average PCDp | (Intercept) | 0.972    | 0.013 | 1405 | 72.579  | <0.001  | LMM   |
|                              |              | year        | -0.003   | 0.001 | 1405 | -3.907  | <0.001  | LMM   |
| Site level                   | MPD          | (Intercept) | 230.531  | 0.887 | 1439 | 259.815 | <0.001  | LMM   |
|                              |              | year        | -0.317   | 0.042 | 1439 | -7.498  | <0.001  | LMM   |
| Within region (among sites)  | Average PCDp | (Intercept) | 0.967    | 0.009 | 17   | 110.629 | <0.001  | LM    |
|                              |              | year        | -0.001   | 0.001 | 17   | -0.676  | 0.508   | LM    |
| Region level                 | MPD          | (Intercept) | 232.493  | 0.297 | 17   | 783.854 | <0.001  | LM    |
|                              |              | year        | 0.024    | 0.028 | 17   | 0.835   | 0.415   | LM    |

**Table S2. Temporal trends in taxonomic diversity at different spatial scales.** Diversity values were calculated and analyzed in similar ways as Table 1. Sorensen: Sorensen dissimilarity; Nestedness: nestedness component of Sorensen dissimilarity; Turnover: turnover component of Sorensen dissimilarity.

| Level                        | Response   | Predictors  | Estimate | SE    | df   | t       | P value | Model |
|------------------------------|------------|-------------|----------|-------|------|---------|---------|-------|
| Within site (among quadrats) | Nestedness | (Intercept) | 0.072    | 0.004 | 1439 | 19.712  | <0.001  | LMM   |
|                              |            | year        | 0.002    | 0.000 | 1439 | 8.577   | <0.001  | LMM   |
| Within site (among quadrats) | Sorensen   | (Intercept) | 0.423    | 0.010 | 1439 | 40.632  | <0.001  | LMM   |
|                              |            | year        | 0.002    | 0.000 | 1439 | 4.413   | <0.001  | LMM   |
| Within site (among quadrats) | Turnover   | (Intercept) | 0.325    | 0.010 | 1439 | 31.433  | <0.001  | LMM   |
|                              |            | year        | 0.000    | 0.000 | 1439 | -0.179  | 0.858   | LMM   |
| Site level                   | Richness   | (Intercept) | 28.875   | 0.752 | 1439 | 38.416  | <0.001  | LMM   |
|                              |            | year        | -0.395   | 0.028 | 1439 | -14.223 | <0.001  | LMM   |
| Within region (among sites)  | Sorensen   | (Intercept) | 0.717    | 0.008 | 17   | 94.106  | <0.001  | LM    |
|                              |            | year        | 0.001    | 0.001 | 17   | 1.383   | 0.185   | LM    |
| Region level                 | Richness   | (Intercept) | 174.411  | 3.640 | 17   | 47.921  | <0.001  | LM    |
|                              |            | year        | -0.537   | 0.345 | 17   | -1.554  | 0.139   | LM    |

**Table S3. Significant interaction between winter precipitation and site grazing history in affecting phylogenetic diversity (MPD).**

| Predictor               | Estimate | SE    | t     | df   | P value |
|-------------------------|----------|-------|-------|------|---------|
| (Intercept)             | 211.64   | 3.750 | 56.44 | 1424 | <0.001  |
| ppt_winter_log          | 2.55     | 0.595 | 4.29  | 1438 | <0.001  |
| Ungrazed                | 11.39    | 4.945 | 2.30  | 1424 | 0.021   |
| ppt_winter_log:Ungrazed | -1.66    | 0.784 | -2.12 | 1438 | 0.034   |

**Table S4. Phylogenetic signal of functional traits.**

| <b>traits</b>            | <b>K</b> | <b>p.K</b> | <b>lambda</b> | <b>p.lambda</b> |
|--------------------------|----------|------------|---------------|-----------------|
| Seed Mass                | 1.879    | 0.001      | 1.000         | < 0.001         |
| Height                   | 0.233    | 0.010      | 0.868         | < 0.001         |
| Specific Leaf Area (SLA) | 0.104    | 0.001      | 0.691         | < 0.001         |
| Leaf Dry Matter Content  | 0.093    | 0.001      | 0.752         | < 0.001         |
| Carbon : Nitrogen        | 0.078    | 0.084      | 0.233         | < 0.001         |
